# Supplementary material for: Genome integrity and neurogenesis of postnatal hippocampal neural stem/progenitor cells require a unique regulator Filia
Source: PubMed Central journal article supplement — Sci Adv. 2020 Oct 28;6(44):eaba0682. doi: 10.1126/sciadv.aba0682 (PMC7608785; doi:10.1126/sciadv.aba0682), 2020-10-28
Supplement: aba0682_SM.pdf [file aba0682_SM.pdf]

[advances.sciencemag.org/cgi/content/full/6/44/eaba0682/DC1](https://advances.sciencemag.org/cgi/content/full/6/44/eaba0682/DC1)

## Supplementary Materials for

### **Genome integrity and neurogenesis of postnatal hippocampal neural stem/progenitor cells require a unique regulator *Filia***

Jingzheng Li, Yafang Shang, Lin Wang, Bo Zhao, Chunli Sun, Jiali Li, Siling Liu,  
Cong Li, Min Tang, Fei-Long Meng\*, Ping Zheng\*

\*Corresponding author. Email: [zhengp@mail.kiz.ac.cn](mailto:zhengp@mail.kiz.ac.cn) (P.Z.); [feilong.meng@sibcb.ac.cn](mailto:feilong.meng@sibcb.ac.cn) (F.-L.M.)

Published 28 October 2020, *Sci. Adv.* **6**, eaba0682 (2020)  
DOI: 10.1126/sciadv.aba0682

#### **The PDF file includes:**

Figs. S1 to S8  
Tables S1 and S2

#### **Other Supplementary Material for this manuscript includes the following:**

(available at [advances.sciencemag.org/cgi/content/full/6/44/eaba0682/DC1](https://advances.sciencemag.org/cgi/content/full/6/44/eaba0682/DC1))

Data files S1 to S4

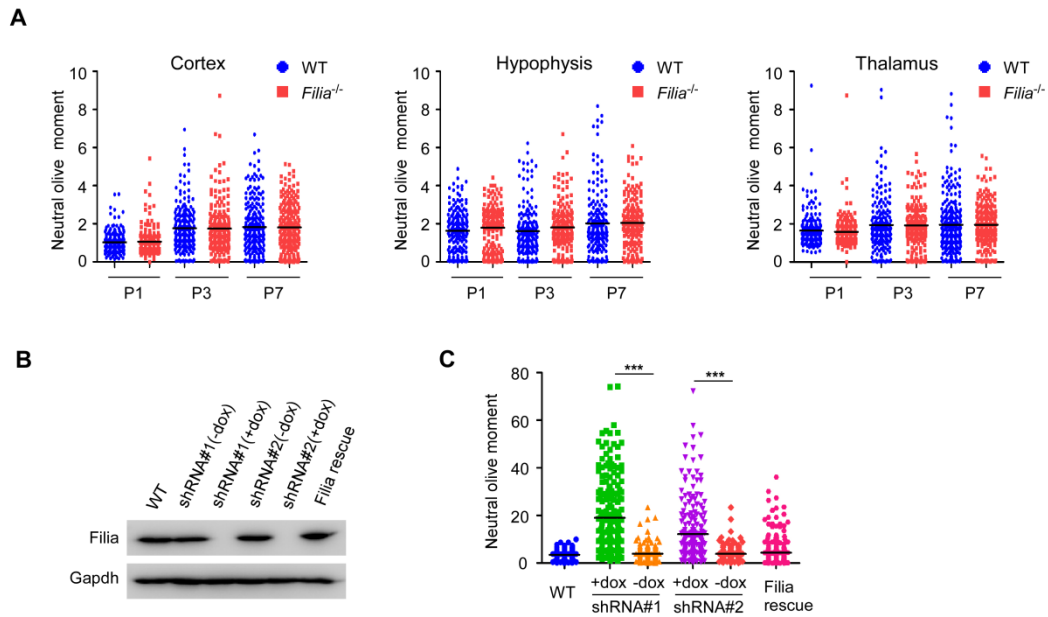

**Fig. S1. Filia maintains genomic stability of hippocampal cells after birth.**

(A) Filia depletion had no influence on the genome integrity of cells in regions of cortex, hypophysis, and thalamus when examined at postnatal day 1 (P1), P3 and P7 by neutral comet assay. (B) Efficient knockdown of Filia in cultured mouse NSPCs by two independent doxycycline (dox)-inducible shRNAs. Filia was re-expressed in knockdown cells. (C) Neutral comet assay showed that knockdown of Filia by two shRNAs significantly increased the DNA DSB levels in cultured mouse NSPCs. Re-expression of Filia rescued the defect. Data were represented as mean  $\pm$  SEM; two-tailed Student's test; \*\*\* $P < 0.001$ .

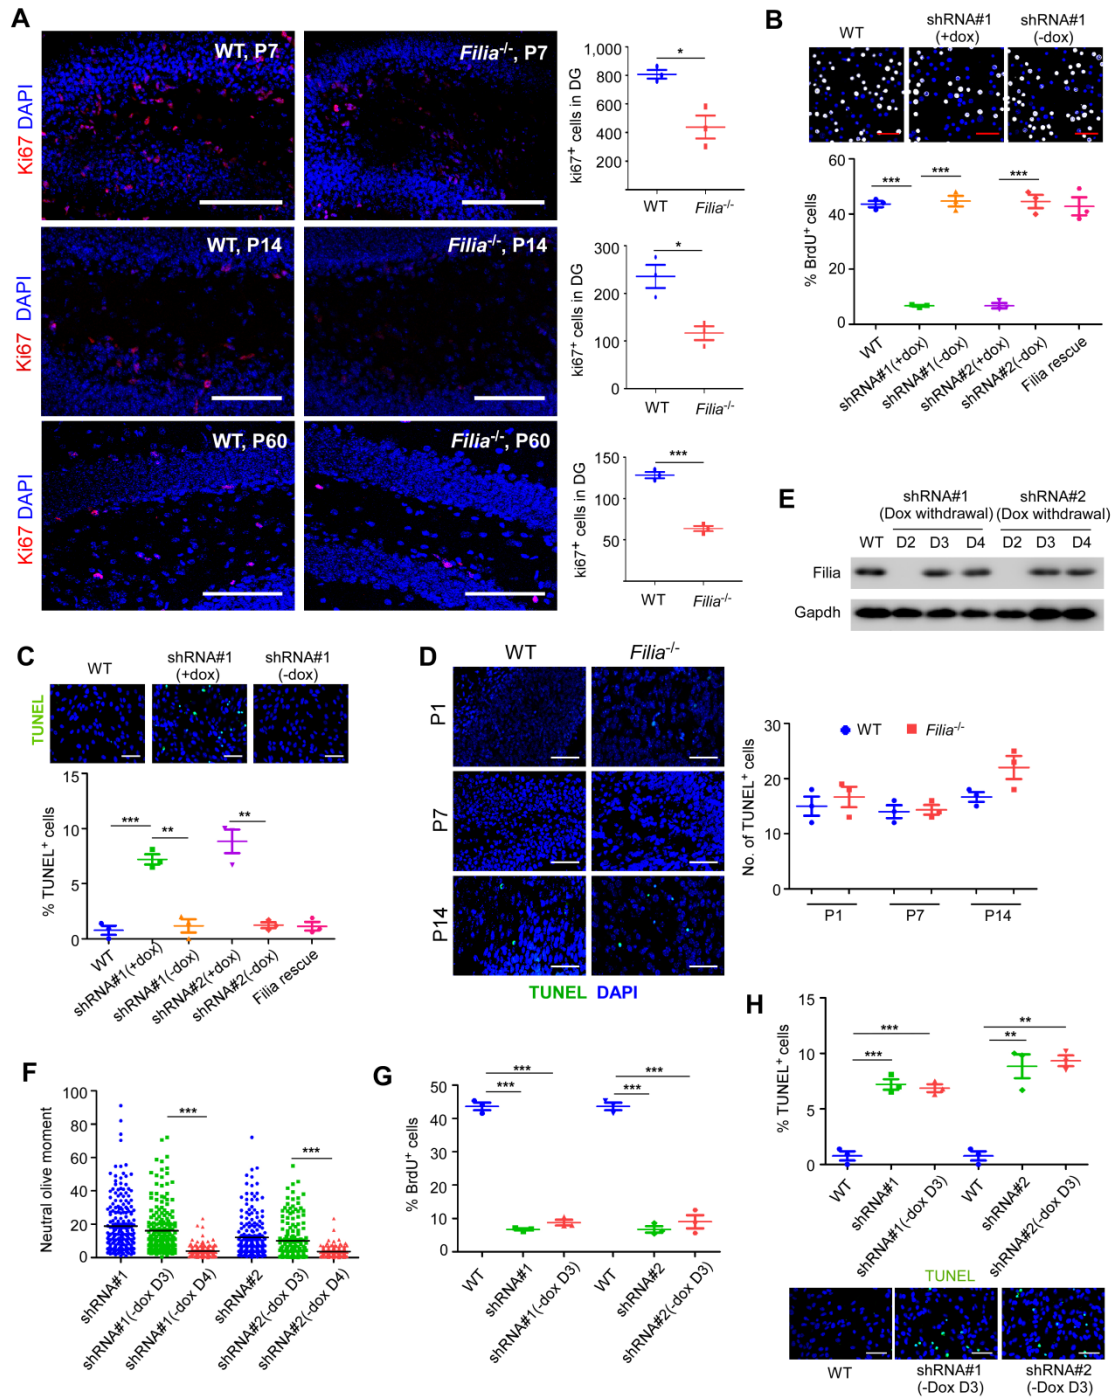

**Fig. S2. Folia depletion impairs the proliferation and induces apoptosis of cultured mouse NSPCs.**

(A) Folia loss impaired the *in vivo* proliferation of hippocampal NSPCs, as examined by Ki67 expression at P7, P14, and P60. Right panel showed the quantification of Ki67<sup>+</sup> cells in dentate gyrus (DG). Scale bar, 100  $\mu$ m. (B) Knockdown of Folia in

cultured NSPCs by dox-inducible shRNAs decreased the proportions of dividing cells capable of BrdU incorporation. Re-expression of Filia rescued the defect. Scale bar, 50  $\mu\text{m}$ . (C) Knockdown of Filia in cultured NSPCs by shRNAs increased the rates of apoptosis. Re-expression of Filia restored the cell viability. Scale bar, 50  $\mu\text{m}$ . (D) TUNEL staining of brain sections showed that Filia depletion did not enhance cell apoptosis in hippocampus when examined at P1, P7 and P14. Scale bar, 100  $\mu\text{m}$ . (E) In dox-induced Filia knockdown NSPCs, removal of dox could restore Filia expression at as early as day 3. (F) On day 3 of dox removal, although Filia expression was restored, the DNA DSBs persisted in cultured NSPCs. The proliferation (G) and apoptosis rates (H) of NSPCs were not rescued by re-expression of Filia on day 3 of dox removal. Scale bars in (H), 50  $\mu\text{m}$ . Data were represented as mean  $\pm$  SEM; two-tailed Student's test; \* $P < 0.05$ , \*\* $P < 0.01$ , \*\*\* $P < 0.001$ .

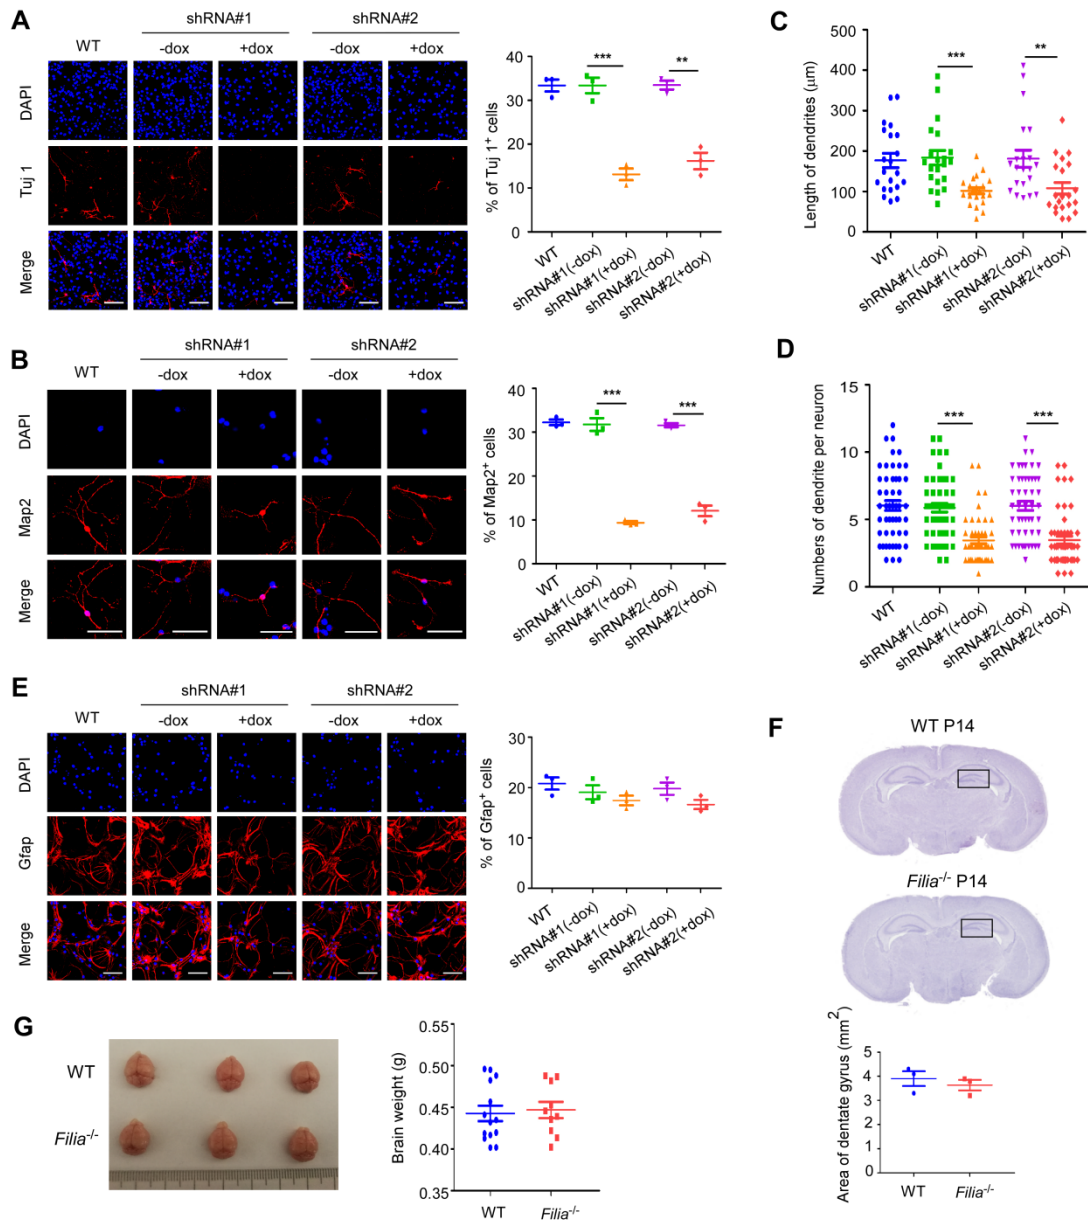

**Fig. S3. Folia deletion impairs hippocampal neurogenesis.**

*In vitro* differentiation assay showed that dox-induced Folia knockdown impaired the differentiation of cultured NSPCs into immature neurons (Tuj1<sup>+</sup> cells) (A) and mature neurons (Map2<sup>+</sup> cells) (B). The neurons differentiated from cultured NSPCs displayed reduced dendritic length (C) ( $n = 21$  cells) and numbers (D) ( $n = 50$  cells) when Folia was knocked down. (E) *In vitro* differentiation of NSPCs into astrocytes was not affected by Folia depletion. (F) The overall hippocampus size and structure were not

apparently affected by Filia depletion. (G) *Filia*<sup>-/-</sup> mice had normal brain structure and weights. Data were represented as mean  $\pm$  SEM; two-tailed Student's test; \*\* $P < 0.01$ , \*\*\* $P < 0.001$ . Scale bars in A, B and E, 50  $\mu\text{m}$ . Credit for photo in S3G: Jingzheng Li, Kunming Institute of zoology, Chinese Academy of Sciences.

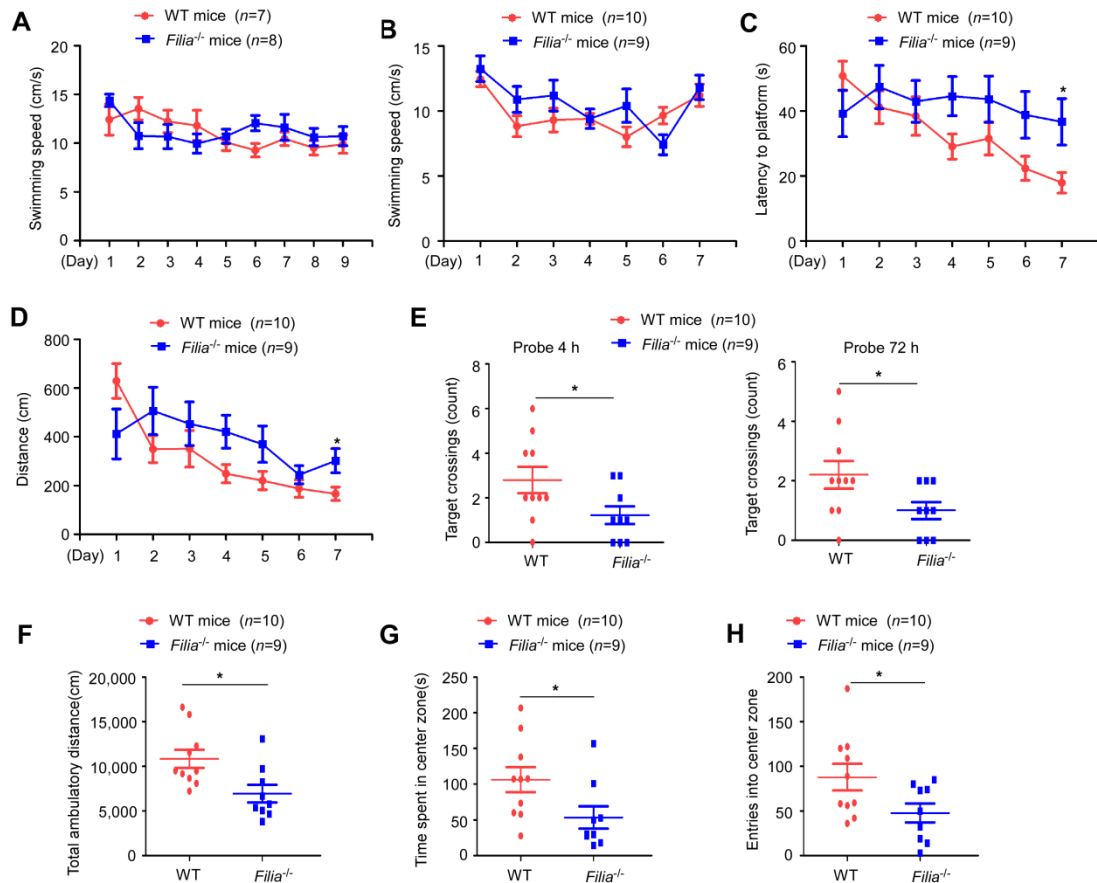

**Fig. S4. *Filia* depletion impairs hippocampal functions in learning, memory and emotional regulation.**

*Filia*<sup>-/-</sup> and WT mice swam in similar speeds at two-month (A) and one-year old (B). Morris water maze test was performed on one-year old mice. *Filia*<sup>-/-</sup> mice spent more time (C) and traveled longer distance (D) in locating the platform at the 7<sup>th</sup> day of training. At 4 h and 72 h of probe trials, *Filia*<sup>-/-</sup> mice showed fewer platform crossings than WT littermates (E). In open field test performed on one-year old mice, *Filia*<sup>-/-</sup> mice showed weaker locomotivity (F), spent much less time in the center zone (G), and exhibited fewer entries into the center zone (H). Data were represented as mean ± SEM; two-way ANOVA with Bonferroni post hoc test (A-D); two-tailed Student's test (E-H); \**P* < 0.05.

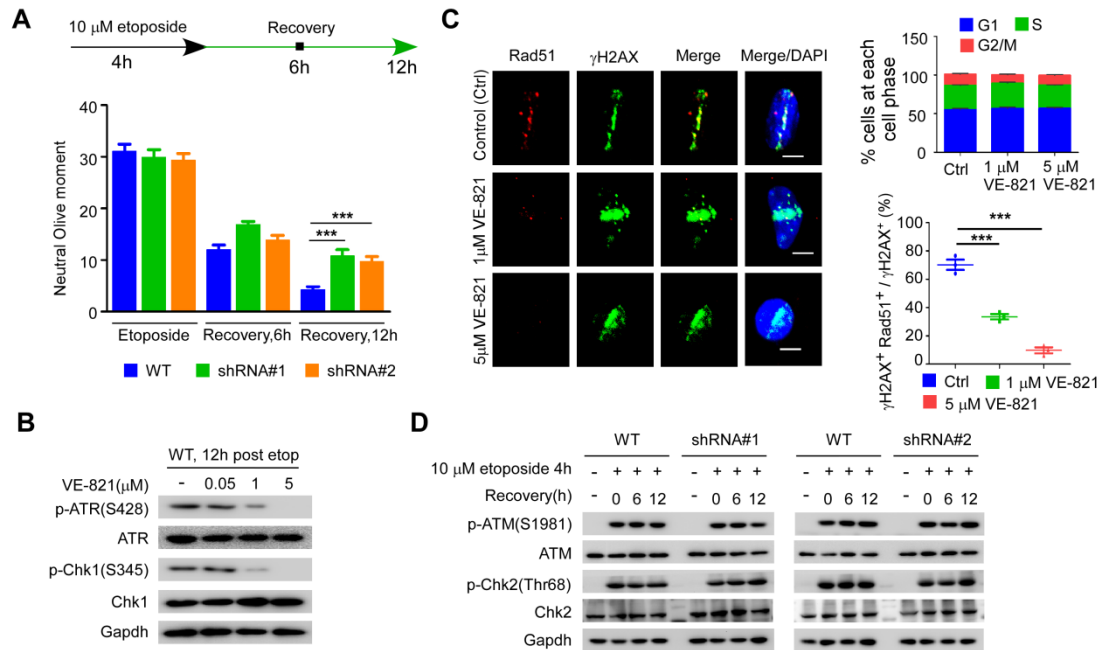

**Fig. S5. Fila-ATR axis regulates the HR repair pathway.**

(A) Neutral comet assay showed Fila dysfunctions compromised DNA DSB repair. (B) ATR activation was successfully blocked by specific inhibitor VE-821 in a dose-dependent manner during response to DNA DSBs. (C) Blockage of ATR activation by VE-821 significantly suppressed the recruitment of Rad51 to DNA DSB sites labeled with  $\gamma$ H2AX in a dose-dependent manner. Because the cell cycle was not altered by temporary inhibition of ATR, the decreased proportions of  $\gamma$ H2AX<sup>+</sup>Rad51<sup>+</sup> cells among  $\gamma$ H2AX<sup>+</sup> cells reflected impairment of HR repair. 50 cells were examined in one replicate and total three repeats were performed. (D) The activation of ATM and Chk2 in Fila knockdown NSPCs was as normal as in WT counterparts. Data were represented as mean  $\pm$  SEM; one-way ANOVA with Bonferroni post hoc test; \*\*\* $P < 0.001$ ; scale bar, 5  $\mu$ m.



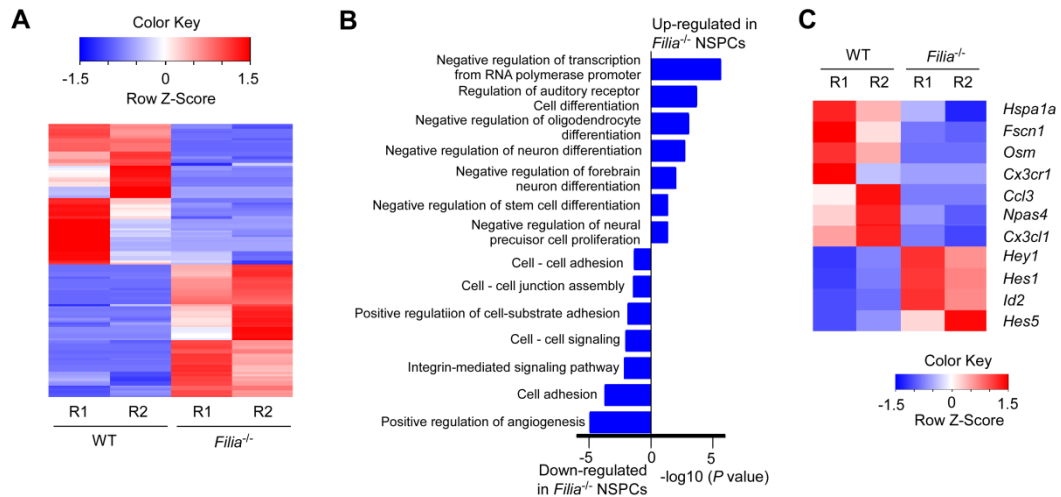

**Fig. S6. RNA sequencing analysis of hippocampal NSPCs in WT and *Filia*<sup>-/-</sup> mice.**

(A) 169 differentially expressed genes (DEGs) were identified in hippocampal NSPCs between WT and *Filia*<sup>-/-</sup> mice. Data were from two replicates (R1 and R2). (B) Gene ontology (GO) enrichment analysis of DEGs in hippocampal NSPCs between WT and *Filia*<sup>-/-</sup> mice. (C) Expression patterns of several example genes crucial for neurogenesis.

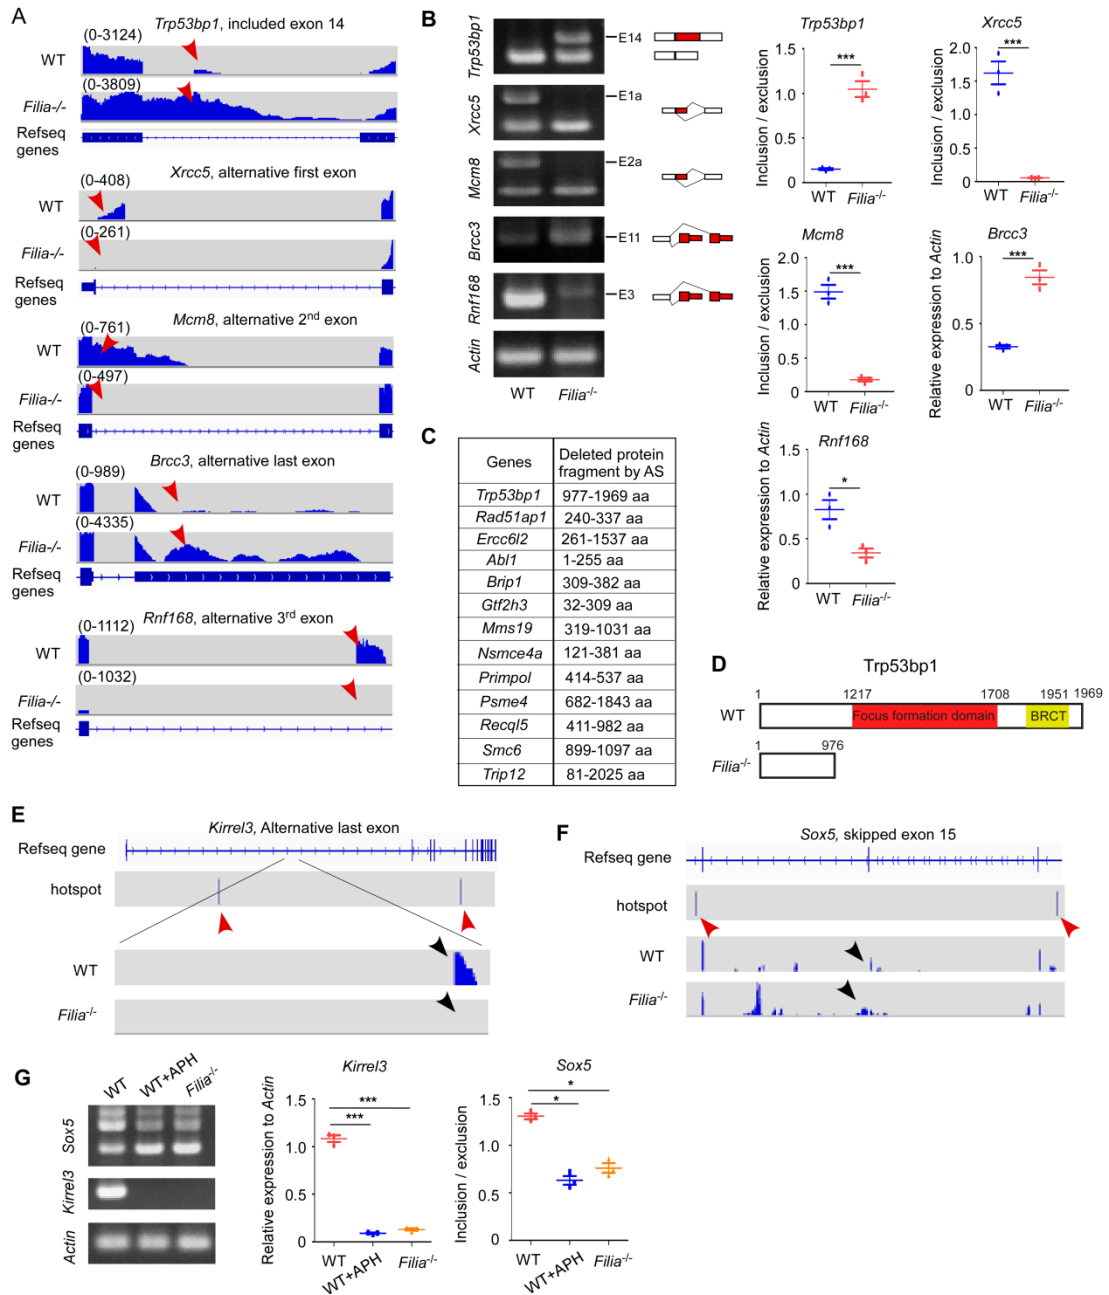

**Fig. S7. Examples of several genes with alternative splicing in *Filia*<sup>-/-</sup> hippocampal NSPCs.**

(A) Examples of five genes with alternative splicing in *Filia*<sup>-/-</sup> NSPCs. Alternative splicing was visualized using IGV software. Alternative exons were indicated by red arrows. The numbers on the left indicated the sites of exons. (B) Validation of alternative splicing of five WT genes by semi-quantitative RT-PCR. Right panel showed

the quantifications of isoform expressions from three replications. E is short for exon.

(C) Genes whose alternative splicing (AS) in *Filia*<sup>-/-</sup> NSPCs was predicted to cause obvious protein fragment deletion. aa is short for amino acid. (D) Diagrams showing Trp53BP1 protein change in *Filia*<sup>-/-</sup> NSPCs. In RDC genes *Kirrel3* (E) and *Sox5* (F), an exon present in WT NSPCs but absent in *Filia*<sup>-/-</sup> cells was flanked by DSBs. Red arrowheads indicate DSBs and black arrowheads indicate alternatively spliced exons.

(G) Semi-quantitative RT-PCR showed that the alternative splicing of *Kirrel3* and *Sox5* in *Filia*<sup>-/-</sup> NSPCs was similar to that in WT NSPCs treated with aphidicolin. Right panel showed the quantifications of isoform expressions from three replications. Data were represented as mean ± SEM; two-tailed Student's test; \**P* < 0.05, \*\*\**P* < 0.001.

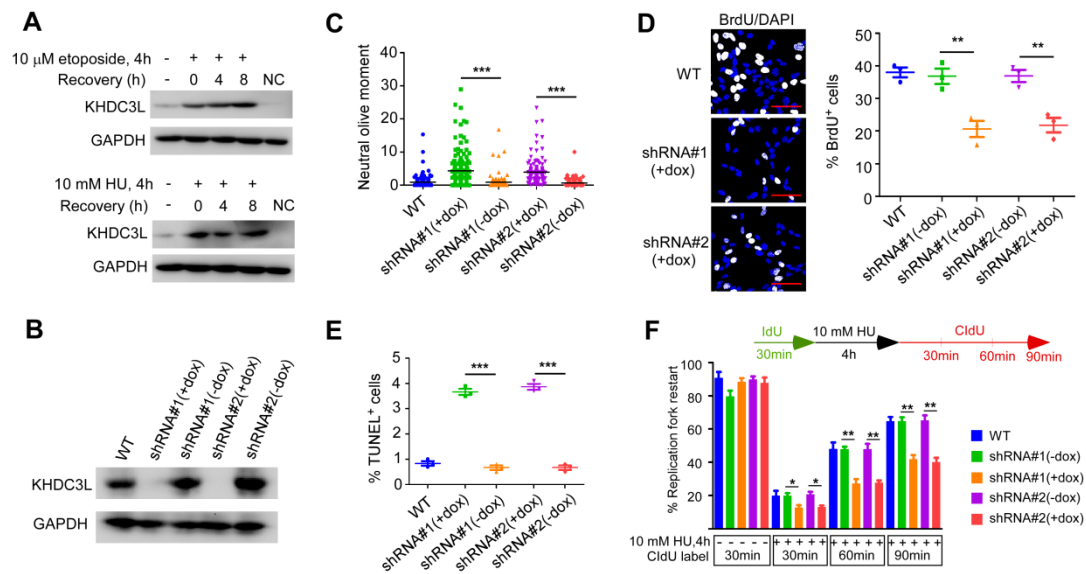

**Fig. S8. Primate ortholog KHDC3L is expressed in cultured rhesus monkey NSPCs and regulates genomic stability.**

(A) KHDC3L protein was expressed in cultured rhesus monkey NSPCs and genotoxic insults (etoposide or HU treatment) stimulated the expression. (B) KHDC3L was efficiently knocked down in monkey NSPCs by two independent dox-inducible shRNAs. (C) Neutral comet assay showed that KHDC3L depletion caused significant increase in DNA DSB levels in cultured monkey NSPCs. (D) BrdU incorporation assay and FACS analysis revealed that KHDC3L depletion compromised the proliferation of monkey NSPCs. Scale bar, 50  $\mu$ m. (E) TUNEL staining and FACS analysis showed the elevated apoptosis of monkey NSPCs depleted of KHDC3L. (F) DNA fiber assay indicated that KHDC3L knockdown decreased the rates of stalled fork restart in monkey NSPCs. Data were represented as mean  $\pm$  SEM; two-tailed Student's test; \* $P < 0.05$ , \*\* $P < 0.01$ , \*\*\* $P < 0.001$ .

**Table S1. Primers used in this study.**

| Gene                       | Primers |                                 |
|----------------------------|---------|---------------------------------|
| Quantitative real time-PCR |         |                                 |
| <i>Filia</i>               | Forward | 5'-GGTCAAACGGGTACACTATGG -3'    |
|                            | Reverse | 5'-CCACGTACAGTCTTTTGGATCT-3'    |
| <i>Actin</i>               | Forward | 5'-TTGCTGATCCACATCTGCTGGAAGG-3' |
|                            | Reverse | 5'-GTGTGACGTTGACATCCGTAAAGAC-3' |
| Single cell RT-PCR         |         |                                 |
| <i>Nestin</i>              | Forward | 5'-TAACTGCCCTAGAGACGGTGT-3'     |
|                            | Reverse | 5'-AGATGCACAGGAGACCCTACTA-3'    |
| <i>Filia</i>               | Forward | 5'-TGGAAATCATGTTTGGTAAGGA-3'    |
|                            | Reverse | 5'-CCATACGACGACGCTCAACT-3'      |
| <i>Neun</i>                | Forward | 5'-AGTCCACGTCTGGCGTACAC-3'      |
|                            | Reverse | 5'-AGACCTGGGATGAGTGATAAGC-3'    |
| <i>Gfap</i>                | Forward | 5'-CCAAACTGGCTGATGTCTACC-3'     |
|                            | Reverse | 5'-TTTCTCTCCAAATCCACACGA-3'     |
| Alternative splicing       |         |                                 |
| <i>Sox5</i>                | Forward | 5'-GCAGCAACAACACAAAATCAACTT-3'  |
|                            | Reverse | 5'-ATGCAGGTGATTTGCCATCAGA-3'    |
| <i>Kirrel3</i>             | Forward | 5'-CGGAGACACAACGAGACCTA-3'      |
|                            | Reverse | 5'-GCTGTGAGAACATTTATGCCACT-3'   |
| <i>Trp53bp1</i>            | Forward | 5'-GGAGCCCAAGAGACATAGTAC-3'     |
|                            | Reverse | 5'-AGTTGTAGGCTTTTCCAGGCTAA-3'   |
| <i>Xrcc5</i>               | Forward | 5'-CTGAGTTGCGACTCTAGGTT-3'      |
|                            | Reverse | 5'-GATTCTTACCAGGAAAGGAGT-3'     |
| <i>Brcc3</i>               | Forward | 5'-TCTTCCCTAGAATAAAGCATGAG-3'   |
|                            | Reverse | 5'-CTTGTGGAGGTTCAATGCGTTG-3'    |
| <i>Mcm8</i>                | Forward | 5'-AGCCTCACAACCGTTACTTCAAC-3'   |
|                            | Reverse | 5'-CCACCAAATGCTTCCTTTTCTT-3'    |
| <i>Rnf168</i>              | Forward | 5'-GTCTTTCGTGGACTCGGTAC-3'      |
|                            | Reverse | 5'-AGGTGGGTGTTACGGATTAGC-3'     |
| 3' UTR shRNA sequence      |         |                                 |
| <i>Filia</i>               | shRNA#1 | 5'-ACGTCTGCAAATCCAGAACCTA-3'    |
|                            | shRNA#2 | 5'-GAGTAAGGCAATGATCTTAAAC-3'    |
| <i>KHDC3L</i>              | shRNA#1 | 5'-CTTCTGTTGAATGGTTGCAAAC-3'    |
|                            | shRNA#2 | 5'-CAAACACAACTTGAGTTCTAA-3'     |
| Mouse genotyping           |         |                                 |
| <i>GFP</i>                 | Forward | 5'-GAGCTGGACGGCGACGTAAC-3'      |
|                            | Reverse | 5'-CGTTGTGGCTGT TGTAGTTGTAC-3'  |
| <i>Filia</i>               | P1      | 5'-TGCCTGGGCAGGTTATTTAG-3'      |
|                            | P2      | 5'-CGAGCGTCTGAAACCTCTTC-3'      |

|                     |           |                                 |
|---------------------|-----------|---------------------------------|
|                     | P3        | 5'-AGCTAGCTTGGCTGGACGTA-3'      |
| HTGTS               |           |                                 |
| Chr12-sgR           | sense     | 5'-CACCATTCGCCAACCCTCGAGAT-3'   |
| NA                  | antisense | 5'-AAACATCTCGAGGGTTGGCGGAAT-3'  |
| Chr15-Myc           | sense     | 5'-CACCGCCCTATTTTCATCTGCGACG-3' |
| c-sgRNA             | antisense | 5'-AAACCGTCGCAGATGAAATAGGGC-3'  |
| Bio- Chr12-sgRNA    |           | Bio/CAGGTGCCAAGTTCTACCAACAAGC   |
| Chr12-sgRNA Red     |           | CCTCTAAGATAAAAACTGGAAGTAGTT     |
| Bio-Chr15-Myc-sgRNA |           | Bio/CGAGCGTCACTGATAGTAGGGAGT    |
| Chr15-Myc-sgRNA Red |           | GCACCAACCAGAGCTGGATAACTCT       |

**Table S2. Antibody information.**

| Name                                                           | Company                   | Catalog#       | Clone#    | Dilution   |
|----------------------------------------------------------------|---------------------------|----------------|-----------|------------|
| Mouse monoclonal anti-IdU                                      | BD Biosciences            | 347580         | B44       | 1:500 (IF) |
| Rat monoclonal anti-BrdU, also used for immunostaining of CldU | Novus                     | NB500-169      | BU1/75    | 1:1000(IF) |
| Rabbit polyclonal anti-Gfap                                    | Abcam                     | ab7260         |           | 1:1000(IF) |
| Rabbit monoclonal anti-NeuN                                    | Abcam                     | ab177487       | EPR12763  | 1:2000(IF) |
| Rabbit monoclonal anti-ki67                                    | Abcam                     | ab16667        | SP6       | 1:300(IF)  |
| Mouse monoclonal anti-Pcna                                     | Cell Signaling Technology | 2586S          | PC10      | 1:1000(IF) |
| Mouse monoclonal anti-Tuj1                                     | Abcam                     | ab78078        | 2G10      | 1:200(IF)  |
| Rabbit monoclonal anti-Map2                                    | Millipore                 | AB5622         |           | 1:300(IF)  |
| Mouse monoclonal anti-Gapdh                                    | Sangon Biotech            | D190090        |           | 1:1000(IB) |
| Rabbit polyclonal anti-Histone H2B                             | EnoGene                   | E1A0866        |           | 1:1000(IB) |
| Rabbit polyclonal anti- $\gamma$ -H2AX                         | Cell Signaling Technology | 9718           | 20E3      | 1:500(IF)  |
| Mouse anti-Rad51 antibody                                      | Abnova                    | H00005888-B01P |           | 1:500(IF)  |
| Rabbit anti-p-ATR (Ser428)                                     | Cell Signaling Technology | 2853S          |           | 1:1000(IB) |
| Rabbit polyclonal anti-ATR                                     | Cell Signaling Technology | 2790S          |           | 1:1000(IB) |
| Mouse monoclonal anti-p-ATM(Ser1981)                           | Novus                     | NB100-307      | 10H11.E12 | 1:1000(IB) |
| Rabbit monoclonal anti-ATM                                     | Cell Signaling Technology | 2873S          | D2E2      | 1:1000(IB) |
| Mouse monoclonal anti- Chk1                                    | Cell Signaling Technology | 2360S          | 261D5     | 1:1000(IB) |
| Rabbit monoclonal anti-Chk2                                    | Cell Signaling Technology | 2662S          |           | 1:1000(IB) |
| Rabbit monoclonal anti-P-Chk1(S345)                            | Cell Signaling Technology | 2348S          | 133D3     | 1:1000(IB) |
| Rabbit monoclonal anti-P-Chk2(Thr68)                           | Cell Signaling Technology | 2917S          | C13C1     | 1:1000(IB) |
| Rabbit anti-KHDC3L antibody                                    | Abcam                     | ab126339       |           | 1:1000(IB) |
| Goat anti-Mouse IgG Secondary Antibody, Alexa Fluor 488        | Thermo Fisher Scientific  | A11029         |           | 1:500(IF)  |
| Donkey anti-Mouse IgG Secondary Antibody, Alexa Fluor 555      | Thermo Fisher Scientific  | A31570         |           | 1:500(IF)  |
| Goat anti-Rabbit IgG Secondary Antibody, Alexa Fluor 488       | Thermo Fisher Scientific  | A11034         |           | 1:500(IF)  |
| Donkey anti-Rabbit IgG Secondary Antibody, Alexa Fluor 555     | Thermo Fisher Scientific  | A31572         |           | 1:500(IF)  |

|                                                       |                          |        |  |            |
|-------------------------------------------------------|--------------------------|--------|--|------------|
| Goat anti-Rat IgG Secondary Antibody, Alexa Fluor Cy3 | Thermo Fisher Scientific | A10522 |  | 1:500(IF)  |
| Goat anti-Rat IgG Secondary Antibody, Alexa Fluor 647 | Thermo Fisher Scientific | A21247 |  | 1:500(IF)  |
| Goat anti-Mouse IgG (H+L) Secondary Antibody, HRP     | Thermo Fisher Scientific | 31430  |  | 1:5000(IB) |
| Goat anti-Rabbit IgG (H+L) Secondary Antibody, HRP    | Thermo Fisher Scientific | 31460  |  | 1:5000(IB) |
